# Supplementary material for: Cervical cancer screening in rural Ethiopia: a cross- sectional knowledge, attitude and practice study
Source: PubMed Central journal article supplement (PMC7298871; doi:10.1186/s12885-020-07060-4), 2020-06-17
Supplement: 12885_2020_7060_MOESM1_ESM.pdf [file 12885_2020_7060_MOESM1_ESM.pdf]

## **Knowledge, attitude and practice of cervical cancer/ reproductive cancer and its screening : a cross-sectional study**

Questionnaire for women, version 06.02.2018

Questionnaire number:

HDSS Number:

Name of interviewer:

Date of interview:

District:

Kebele:

Start time:

Finish time:

### **Part 1: socio demographic characteristics of the respondents**

| <b>Number</b> | <b>questions</b>                          | <b>answers</b>                                                                             |
|---------------|-------------------------------------------|--------------------------------------------------------------------------------------------|
| <b>101</b>    | what is your age?                         | ...years                                                                                   |
| <b>102</b>    | What is your Religion?                    | 1.orthodox<br>2.muslim<br>3.protestant<br>4.catholic<br>5.other                            |
| <b>103</b>    | what is your marital status?              | 1.single<br>2.married<br>3.divorced<br>4.widowed<br>5.separated                            |
| <b>104</b>    | what is your ethnicity?                   | 1.gurage<br>2.silite<br>3.hadiya<br>4.kambata<br>5.romo<br>6.amhara<br>7.Tigire<br>8.other |
| <b>105</b>    | what is the level of school you attended? | ...years<br>higher education                                                               |

| Number | questions                              | answers                                                                                                                          |
|--------|----------------------------------------|----------------------------------------------------------------------------------------------------------------------------------|
| 106    | what is your occupation?               | 1.housewife<br>2.private employee<br>3.farmer<br>4.government employee<br>6.daily laborer<br>7.merchant<br>8.student<br>9.others |
| 107    | what is your current residence area?   | 1.city<br>2.village                                                                                                              |
| 108    | do you have a monthly income?          | 1.yes<br>2. no<br><b>If no, skip question 109</b>                                                                                |
| 109    | how much money do you have this month? | ..birr                                                                                                                           |
| 110    | do you have health insurance?          | 1.yes<br><u>2.no</u>                                                                                                             |

## **Part 2: respondents reproductive data**

| number | questions                                               | answers                                                         |
|--------|---------------------------------------------------------|-----------------------------------------------------------------|
| 201    | have you ever been pregnant?                            | 1.yes<br><u>2.no</u><br><b>if no, skip question 202</b>         |
| 202    | if yes how many times have you been pregnant?           | ...times                                                        |
| 203    | have you ever given birth?                              | 1.yes<br><u>2.no</u><br><b>if no, skip question 204 and 205</b> |
| 204    | how old were you when you first gave birth?             | ...years                                                        |
| 205    | how many children do you have?                          | ...                                                             |
| 206    | how old were you when you first had sexual intercourse? | 1. ...years<br>2. I don't know<br>3. Never                      |
| 207    | did you use any contraceptive methods                   | 1.yes<br><u>2.no</u>                                            |
| 208    | are you currently using contraceptive methods?          | 1.yes<br><u>2.no</u><br><b>if no, skip question 209</b>         |

| number | questions                                    | answers                                                                                        |
|--------|----------------------------------------------|------------------------------------------------------------------------------------------------|
| 209    | if yes which method are you currently using? | 1.IUD<br>2.injectable<br>3.implants<br>4.pills<br>5.male condom<br>6.female condom<br>7.others |

**Part 3 : general knowledge about cervical cancer/ reproductive cancer**

| number | question                                                                          | answer                                                                                                                          |
|--------|-----------------------------------------------------------------------------------|---------------------------------------------------------------------------------------------------------------------------------|
| 301    | have you ever heard of cervical cancer/ reproductive cancer?                      | 1.yes<br>2. no<br>3. I don't know                                                                                               |
| 302    | Have you ever had contact with someone with cervical cancer/ reproductive cancer? | 1.yes<br>2.no<br>3. I don't know                                                                                                |
| 303    | Do you know symptoms of cervical cancer/ reproductive cancer?                     | 1.yes<br>2. no<br>3. I don't know<br><b>if no/ I don't know skip question 304</b>                                               |
| 304    | which symptoms do you know?                                                       | 1.abnormal bleeding<br>2.discharge<br>3.pelvic pain<br>4.bleeding after sex<br><b>Participant can name more than one answer</b> |
| 305    | do you think that there is a way to reduce the risk of developing cancer?         | 1.yes<br>2. no<br>3. I don't know<br><b>if no/ I don't know, skip question 306</b>                                              |
| 306    | if yes how can you reduce your risk?                                              | 1.modifying lifestyle<br>2.vaccine<br>3.screening<br>4.use of condom<br><b>Participant can name more than one answer</b>        |
| 307    | Can you get vaccinated against cervical cancer/ reproductive cancer?              | 1.yes<br>2. no<br>3. I don't know                                                                                               |
| 308    | is it possible to screen for cervical cancer/ reproductive cancer?                | 1. yes<br>2. no<br>3. I don't know                                                                                              |

| number | question                                       | answer                                                                                                                          |
|--------|------------------------------------------------|---------------------------------------------------------------------------------------------------------------------------------|
| 309    | do you know any women that have been screened? | 1. yes<br>2. no<br>3. I don't know                                                                                              |
| 310    | Do you know any method of screening?           | 1. yes<br>2. no<br>3. I don't know                                                                                              |
| 311    | have you heard of VIA?                         | 1. yes<br>2. no<br>3. I don't know<br><b>if no/ I don't know, skip question 315</b>                                             |
| 312    | how often should a women go for VIA            | 1.every year<br>2.every 3 year<br>3.every 5 years<br>4.every 10 years<br>5.only once<br><b>Please take down only one answer</b> |
| 313    | have you heard of HPV test?                    | 1. yes<br>2. no<br>3. I don't know                                                                                              |
| 314    | have you heard of the cytological examination? | 1.yes<br>2. no<br>3. I don't know                                                                                               |
| 315    | do you think early detection is helpful?       | 1. yes<br>2. no<br>3. I don't know                                                                                              |

**Part 4: participant's perception of risk factors of cervical cancer/ reproductive cancer**

| number | question                                                                                 | responses                                                                                                         |
|--------|------------------------------------------------------------------------------------------|-------------------------------------------------------------------------------------------------------------------|
| 401    | Which age group has the highest risk of developing cervical cancer/ reproductive cancer? | 1. 15-30<br>2. 30-49<br>3. 50-70<br>4. >70<br>5. I don't know<br><b>participant can name more than one answer</b> |
| 402    | Is HPV infection a risk factor for cervical cancer/ reproductive cancer?                 | 1. yes<br>2. no<br>3. I don't know                                                                                |
| 403    | Is HIV infection a risk factor for cervical cancer/ reproductive cancer?                 | 1. yes<br>2. no<br>3. I don't know                                                                                |

| number | question                                                                                                  | responses                         |
|--------|-----------------------------------------------------------------------------------------------------------|-----------------------------------|
| 404    | Is having multiple sexual partners a risk factor for cervical cancer/ reproductive cancer?                | 1.yes<br>2. no<br>3. I don't know |
| 405    | Is early sexual intercourse a risk factor for cervical cancer/ reproductive cancer?                       | 1.yes<br>2. no<br>3. I don't know |
| 406    | Is a history of sexually transmitted diseases a risk factor for cervical cancer/ reproductive cancer?     | 1.yes<br>2. no<br>3. I don't know |
| 407    | Are a large number of pregnancies and childbirths risks factors for cervical cancer/ reproductive cancer? | 1.yes<br>2. no<br>3. I don't know |
| 408    | Is hormonal contraception a risk factor?                                                                  | 1.yes<br>2. no<br>3. I don't know |
| 409    | is occurrence of cervical cancer/ reproductive cancer in the family a risk factor?                        | 1.yes<br>2. no<br>3. I don't know |
| 410    | Is smoking a risk factor?                                                                                 | 1.yes<br>2. no<br>3. I don't know |

### **Part 5: attitude towards the disease and it's screening**

| number | question                                                                     | answer                |
|--------|------------------------------------------------------------------------------|-----------------------|
| 501    | Cervical cancer/ reproductive cancer is a serious disease and can be deadly. | 1<br>2<br>3<br>4<br>5 |
| 502    | Cervical cancer/ reproductive cancer is a serious disease in my community    | 1<br>2<br>3<br>4<br>5 |
| 503    | I can get cervical cancer/ reproductive cancer.                              | 1<br>2<br>3<br>4<br>5 |
| 504    | It is possible to screen for cervical cancer/ reproductive cancer.           | 1<br>2<br>3<br>4<br>5 |

| number | question                                                                                                                                                       | answer                |
|--------|----------------------------------------------------------------------------------------------------------------------------------------------------------------|-----------------------|
| 505    | I am scared of the screening process                                                                                                                           | 1<br>2<br>3<br>4<br>5 |
| 506    | I want to know if I have cervical cancer/ reproductive cancer.                                                                                                 | 1<br>2<br>3<br>4<br>5 |
| 507    | Cervical cancer/ reproductive cancer can be treated.                                                                                                           | 1<br>2<br>3<br>4<br>5 |
| 508    | I want to get treated, if I have cervical cancer/ reproductive cancer.                                                                                         | 1<br>2<br>3<br>4<br>5 |
| 509    | My husband allows me/ supports me to get tested for cervical cancer/ reproductive cancer.<br><br><b>Skip question 509 and 510, if the woman is not married</b> | 1<br>2<br>3<br>4<br>5 |
| 5010   | My husband allows me/ wants me to get treated if I have cervical cancer/ reproductive cancer.                                                                  | 1<br>2<br>3<br>4<br>5 |
| 511    | I feel supportive and positive towards people with cervical cancer/ reproductive cancer in your community                                                      | 1<br>2<br>3<br>4<br>5 |
| 512    | My community feels supportive and caring for people with cervical cancer/ reproductive cancer.                                                                 | 1<br>2<br>3<br>4<br>5 |

**likert scale**

1 for sure no

2 no

3 maybe

4 yes

5 for sure yes

**Part 6: practice of cervical cancer/ reproductive cancer screening**

| number | question                                                              | answer               |
|--------|-----------------------------------------------------------------------|----------------------|
| 601    | Have you ever been screened for cervical cancer/ reproductive cancer? | 1.yes<br><u>2.no</u> |
| 602    | Do you want to get screened for cervical cancer/ reproductive cancer? | 1.yes<br><u>2.no</u> |
| 603    | Do you have access to cervical cancer/ reproductive cancer screening? | 1.yes<br><u>2.no</u> |

### **Part 7: sources of information**

| number | question                                                                                  | answer                                                                                                                                                                                                                   |
|--------|-------------------------------------------------------------------------------------------|--------------------------------------------------------------------------------------------------------------------------------------------------------------------------------------------------------------------------|
| 701    | Do you feel well informed about cervical cancer/ reproductive cancer?                     | 1.yes<br><u>2.no</u>                                                                                                                                                                                                     |
| 702    | Do you want to learn more about cervical cancer/ reproductive cancer?                     | 1.yes<br><u>2.no</u>                                                                                                                                                                                                     |
| 703    | What is your source of knowledge?<br><br><b>Participant can name more than one answer</b> | 1.none<br>2.newspaper/magazine<br>3.Radio<br>4.Television<br>5.Billboards, posters<br>6.brochures<br>7.health workers<br>8.family, friends,<br>9.neighbors, colleges<br>10.religious leaders<br>11.teachers<br>12.others |
